# Supplementary material for: Cold Atmospheric Plasma Jet Treatment Improves Human Keratinocyte Migration and Wound Closure Capacity without Causing Cellular Oxidative Stress
Source: MDPI journal article supplement (doi:10.3390/ijms231810650), 2022-09-13
Supplement: s1 [file s1]

# Cold Atmospheric Plasma Jet Treatment Improves Human Keratinocyte Migration and Wound Closure Capacity without Causing Cellular Oxidative Stress

Aurélie Marches, Emily Clement, Géraldine Albérola, Marie-Pierre Rols, Sarah Cousty, Michel Simon \* and Nofel Merbahi

## SUPPLEMENTARY MATERIALS

### 1. Supplementary Methods

**Hydrogen peroxide (H<sub>2</sub>O<sub>2</sub>) quantification.** The concentration of H<sub>2</sub>O<sub>2</sub> in DPBS was quantified immediately after exposure to plasma using the Amplex® Red Hydrogen Peroxide/Peroxidase Assay Kit (Invitrogen, ThermoFisher Scientific) according to the manufacturer's protocols. Absorbance at 560 nm was read using a plate reader (Biochrom Asys UVM340, Biochrom Ltd, Cambridge, United Kingdom).

**Nitrite/nitrate (NO<sub>2</sub><sup>-</sup>/NO<sub>3</sub><sup>-</sup>) ions quantification.** NO<sub>2</sub><sup>-</sup>/NO<sub>3</sub><sup>-</sup> ion concentrations in DPBS were quantified immediately after exposure to the plasma jet using a colorimetric Nitrite/Nitrate Assay kit (Sigma, Merck KGaA, Darmstadt, Germany) according to the manufacturer's protocols. Absorbance at 540 nm was read using the Biochrom Asys UVM340 plate reader.

## 2. Supplementary Figures

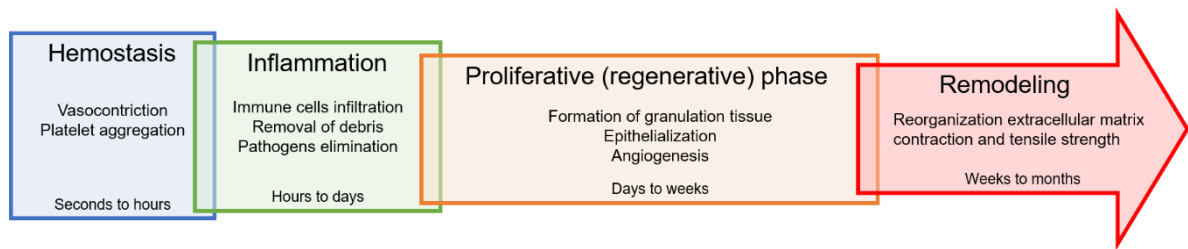

Figure S1: Diagram of the four stages of acute wound healing.

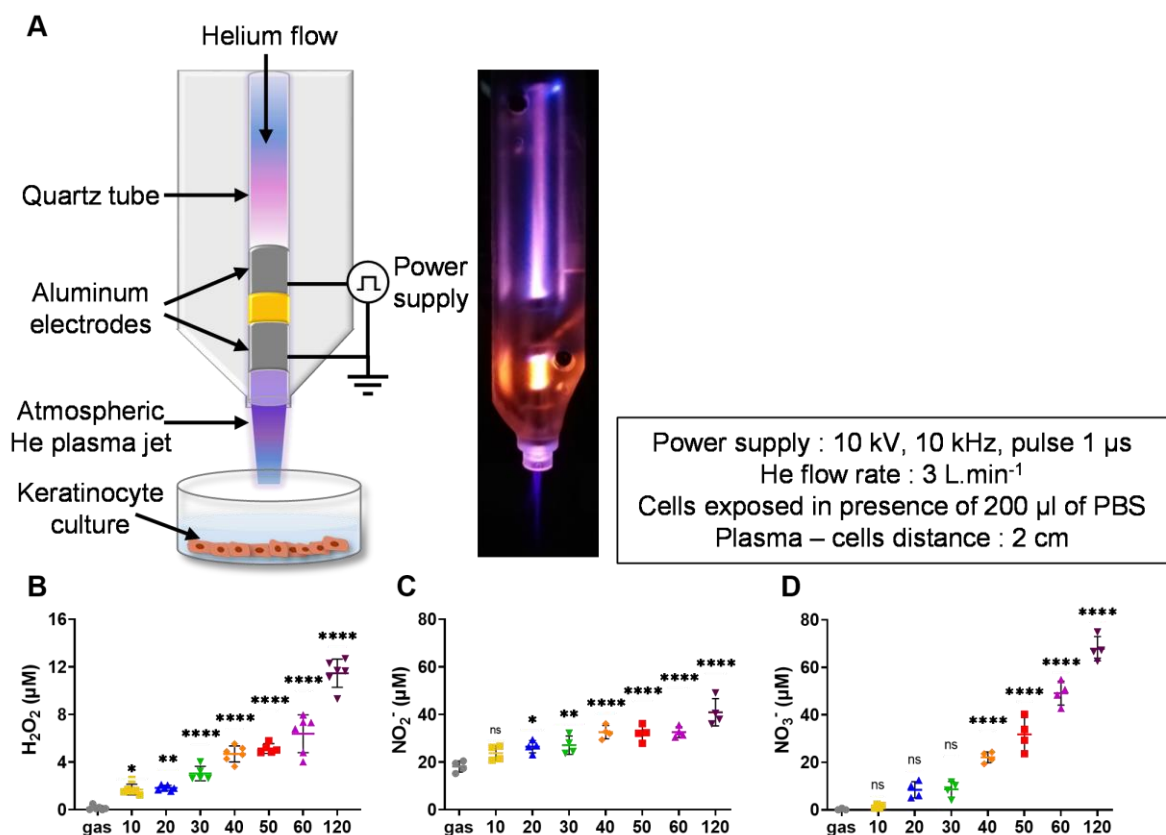

Figure S2: Concentrations of reactive oxygen and nitrogen oxide species increased with increasing exposure time to the helium plasma jet. **A.** Schematic diagram of the CAP-treatment using our helium plasma jet device. **B-D.** Dosages by colorimetric assays of RONS in fresh PBS, containing  $\text{CaCl}_2$  and  $\text{NaCl}_2$ , CAP-treated for 10 s to 120 s, treated with gas alone for 120 s as control: **B.** Hydrogen peroxide, **C.** Nitrite anion, **D.** Nitrate anion.  $n > 4$ ; error bars represent S.D. \*,  $p < 0.05$ ; \*\*,  $p < 0.005$ ; \*\*\*,  $p < 0.001$ ; \*\*\*\*,  $p < 0.0001$ .

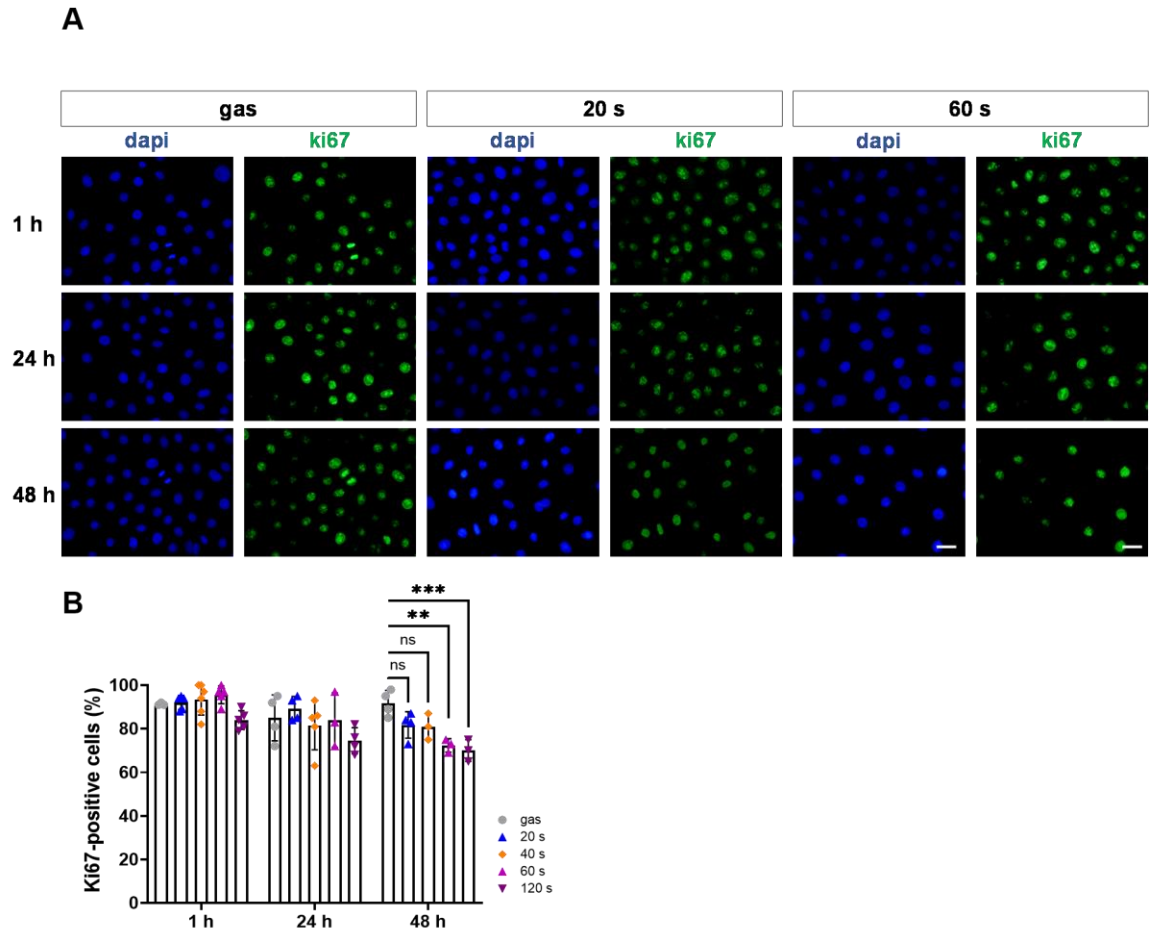

**Figure S3: CAP treatments of less than 60 s did not affect N/TERT-1 proliferation.** N/TERT-1 keratinocytes were CAP-treated for the indicated periods of time ranging from 20 s to 120 s. The proportion of proliferating cells was determined by immunocytochemistry on fixed and permeabilized cells using an anti-Ki-67 antibody (green), 1 h, 24 h and 48 h after exposure to CAP. Nuclei were stained with DAPI (blue). **A.** Representative images. White arrows indicate Ki-67 negative cells. Scale bar is 25  $\mu$ m. **B.** Quantitative analyses. N = 4; error bars represent S.D. \*,  $p < 0.05$ ; \*\*,  $p < 0.005$ ; \*\*\*,  $p < 0.001$ ; \*\*\*\*,  $p < 0.0001$ . ns: not significant.

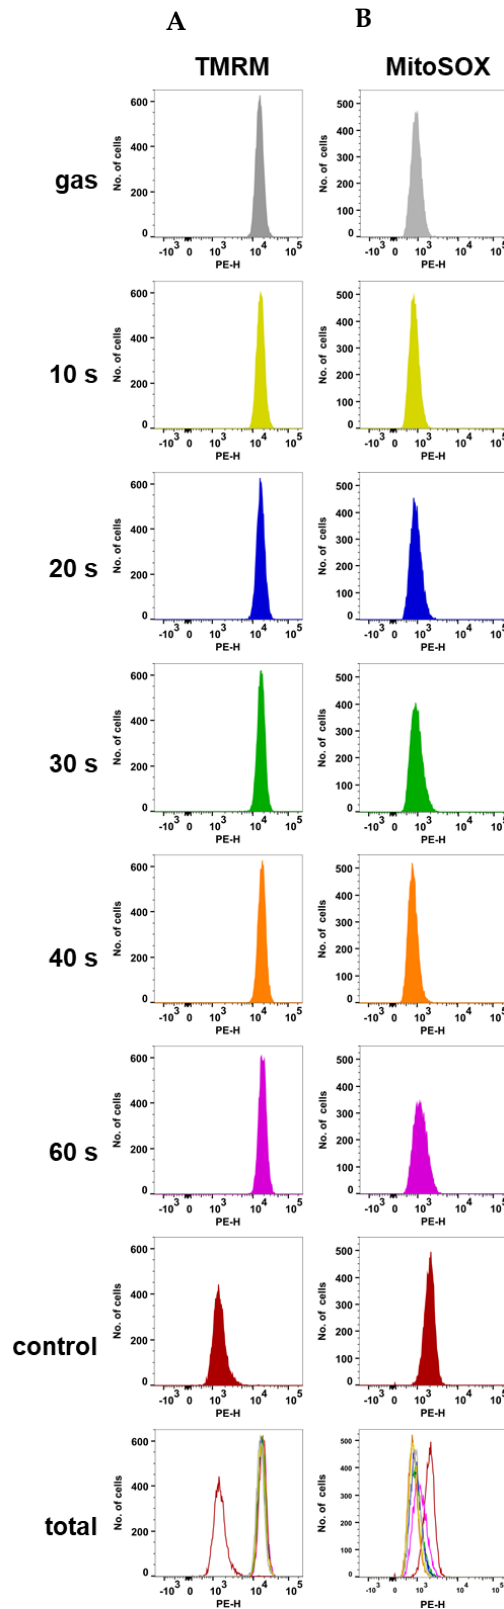

**Figure S4: Representative graphs of flow cytometry quantification using TMRM and MitoSOX 6 h after exposure to CAP.** N/TERT-1 keratinocytes were exposed to CAP for the indicated periods of time ranging from 10 s to 60 s. **A.** Representative graphs of flow cytometry quantification of TMRM immunofluorescence 6 h after exposure to CAP. We used 2  $\mu$ M CCCP as a positive control for membrane depolarization. **B.** Representative graphs of flow cytometry quantification of MitoSOX Red Mitochondrial SuperOxide immunofluorescence 6 h after exposure to CAP. Two  $\mu$ M antimycin was used as a positive control for mitochondrial anion superoxide production.
